# Supplementary material
Source: HighWire-hosted journal article supplement (https://erj.ersjournals.com/content/56/5/2000118)
Supplement: inline-supplementary-material-2 [file inline-supplementary-material-2.pdf]

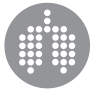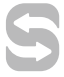

SHAREABLE PDF

# SABRTooth: a randomised controlled feasibility study of stereotactic ablative radiotherapy (SABR) with surgery in patients with peripheral stage I nonsmall cell lung cancer considered to be at higher risk of complications from surgical resection

Kevin N. Franks<sup>1,2,13</sup>, Lucy McParland<sup>3,13</sup>, Joanne Webster<sup>3</sup>, David R. Baldwin<sup>4</sup>, David Sebag-Montefiore<sup>1,2,3</sup>, Matthew Evison<sup>5</sup>, Richard Booton<sup>5</sup>, Corinne Faivre-Finn<sup>6</sup>, Babu Naidu<sup>7</sup>, Jonathan Ferguson<sup>8</sup>, Clive Peedell<sup>8</sup>, Matthew E.J. Callister<sup>9</sup>, Martyn Kennedy<sup>9</sup>, Jenny Hewison<sup>10</sup>, Janine Bestall<sup>10</sup>, Walter M. Gregory<sup>3</sup>, Peter Hall<sup>11</sup>, Fiona Collinson<sup>3</sup>, Catherine Olivier<sup>3</sup>, Rachel Naylor<sup>3</sup>, Sue Bell<sup>3</sup>, Peter Allen<sup>12</sup>, Andrew Sloss<sup>12</sup> and Michael Snee<sup>1</sup>

**Affiliations:** <sup>1</sup>Leeds Cancer Centre, St James's University Hospital, Leeds, UK. <sup>2</sup>Leeds Institute of Medical Research, University of Leeds, Leeds, UK. <sup>3</sup>Clinical Trials Research Unit, Leeds Institute of Clinical Trials Research, University of Leeds, Leeds, UK. <sup>4</sup>Nottingham University Hospitals, Nottingham, UK. <sup>5</sup>Manchester University Hospitals NHS Foundation Trust and University of Manchester, Manchester, UK. <sup>6</sup>University of Manchester and The Christie NHS Foundation Trust, Manchester, UK. <sup>7</sup>Institute of Inflammation and Ageing, College of Medical and Dental Sciences, University of Birmingham, Birmingham, UK. <sup>8</sup>The James Cook University Hospital, Middlesbrough, UK. <sup>9</sup>Dept of Respiratory Medicine, Leeds Teaching Hospitals, Leeds, UK. <sup>10</sup>Leeds Institute of Health Sciences, University of Leeds, Leeds, UK. <sup>11</sup>Western General Hospital, University of Edinburgh, Edinburgh, UK. <sup>12</sup>Patient and Public Involvement Representative, Leeds, UK. <sup>13</sup>Joint first authors.

**Correspondence:** Kevin N. Franks, Level 4, Bexley Wing, Leeds Cancer Centre, St James's University Hospital, Beckett Street, Leeds, LS9 7TF, UK. E-mail: kevin.franks@nhs.net

 @ERSpublications

**Despite recruiting at a higher rate than previous studies, SABRTooth showed that a large UK RCT was not feasible. Patients found it challenging to accept randomisation between surgery and SABR due to their preferences. Alternative study designs are needed.** <https://bit.ly/2XtdV06>

**Cite this article as:** Franks KN, McParland L, Webster J, *et al.* SABRTooth: a randomised controlled feasibility study of stereotactic ablative radiotherapy (SABR) with surgery in patients with peripheral stage I nonsmall cell lung cancer considered to be at higher risk of complications from surgical resection. *Eur Respir J* 2020; 56: 2000118 [<https://doi.org/10.1183/13993003.00118-2020>].

This single-page version can be shared freely online.

## ABSTRACT

**Objectives:** Stereotactic ablative radiotherapy (SABR) is a well-established treatment for medically inoperable peripheral stage I nonsmall cell lung cancer (NSCLC). Previous nonrandomised evidence supports SABR as an alternative to surgery, but high-quality randomised controlled trial (RCT) evidence is lacking. The SABRTooth study aimed to establish whether a UK phase III RCT was feasible.

**Design and methods:** SABRTooth was a UK multicentre randomised controlled feasibility study targeting patients with peripheral stage I NSCLC considered to be at higher risk of surgical complications. 54

patients were planned to be randomised 1:1 to SABR or surgery. The primary outcome was monthly average recruitment rates.

**Results:** Between July 2015 and January 2017, 318 patients were considered for the study and 205 (64.5%) were deemed ineligible. Out of 106 (33.3%) assessed as eligible, 24 (22.6%) patients were randomised to SABR (n=14) or surgery (n=10). A key theme for nonparticipation was treatment preference, with 43 (41%) preferring nonsurgical treatment and 19 (18%) preferring surgery. The average monthly recruitment rate was 1.7 patients against a target of three. 15 patients underwent their allocated treatment: SABR n=12, surgery n=3.

**Conclusions:** We conclude that a phase III RCT randomising higher risk patients between SABR and surgery is not feasible in the National Health Service. Patients have pre-existing treatment preferences, which was a barrier to recruitment. A significant proportion of patients randomised to the surgical group declined and chose SABR. SABR remains an alternative to surgery and novel study approaches are needed to define which patients benefit from a nonsurgical approach.
